# Supplementary material for: A Systematic Review of MicroRNA Signatures Associated with the Progression of Leukoplakia with and without Epithelial Dysplasia
Source: MDPI journal article supplement (doi:10.3390/biom11121879), 2021-12-14
Supplement: s1 [file s1]

Supplementary tables/figures:

**Figure S1: Illustration of the steps involved in selection of eligible studies for this systematic**

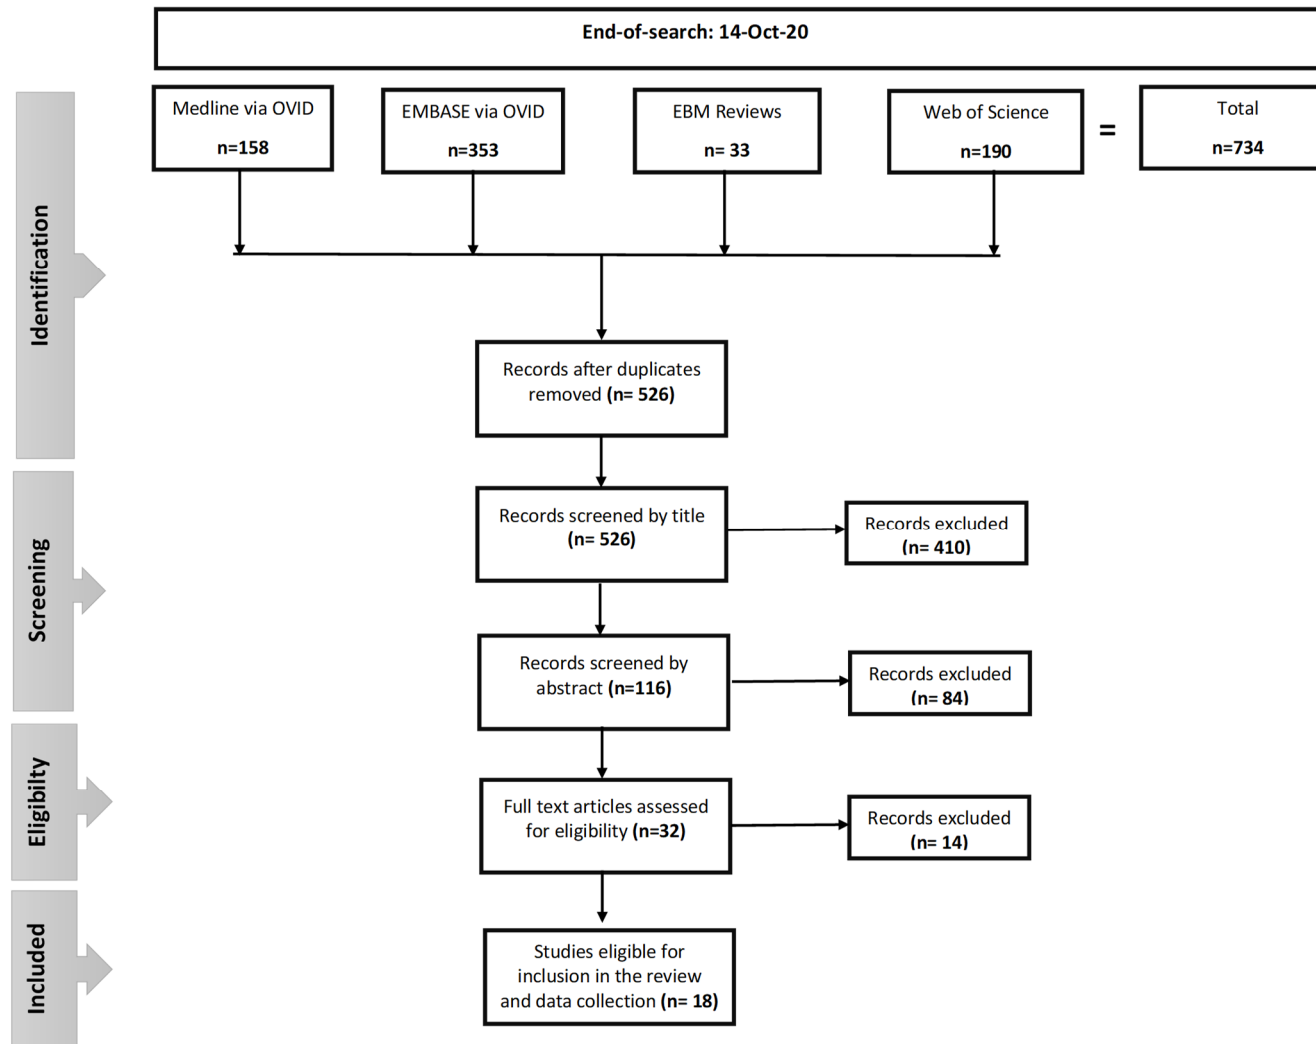

**Supplementary Table S1: Key findings of miRNAs investigated singularly.**

| miRNAs           | Author,<br>Direction of dysregulation<br>reported      | Fold change<br>OLK/OED vs N | Fold change OLK/OED vs<br>OSCC | Fold change N vs OSCC | Fold change progressive<br>OLK/OED vs Non progressive<br>OLK/OED                                                                                      |
|------------------|--------------------------------------------------------|-----------------------------|--------------------------------|-----------------------|-------------------------------------------------------------------------------------------------------------------------------------------------------|
| miR 181c         | (Yang <i>et al.</i> , 2013) ↓                          | NS                          | NS                             | NS                    | ↓15.40 (p<0.011)                                                                                                                                      |
| miR 211          | Check again for new data<br>(excel sheet dated 7/2/21) |                             |                                |                       |                                                                                                                                                       |
| miR 204-5p       | (Philipone <i>et al.</i> , 2016)<br>↑↓                 | NS                          | NS                             | NS                    | Progressive Vs non-<br>progressive: 1.60 (p<0.250).<br><br>↓ in deep sequencing analysis<br>and ↑ in progressive group in<br>the validation set (Nss) |
| miR 222-3p       | (Chang <i>et al.</i> , 2018) ↓                         | ↓ (p<0.0001)                | NS                             | ↓ (p<0.0001)          | NS                                                                                                                                                    |
| miR 423-5p       | (Chang <i>et al.</i> , 2018) ↑                         | NS                          | ↑in OSCC (p<0.001)             | ↑(p<0.001)            | NS                                                                                                                                                    |
| miR 150-5p       | (Chang <i>et al.</i> , 2018) ↑                         | NS                          | ↑in OSCC (p<0.001)             | ↑(p<0.001)            | NS                                                                                                                                                    |
| miR-133b         | (Cervigne <i>et al.</i> , 2009) ↓                      | ↓ 0.013 Nss (p=1)           | NS                             | ↓0.319 Nss (p=1)      | NS                                                                                                                                                    |
| miR 494          | (Harrandah <i>et al.</i> , 2016) ↓                     | NS                          | ↓ (0.015)                      | NS                    | NSD                                                                                                                                                   |
| miR 375          | (Harrandah <i>et al.</i> , 2016) ↓                     | NS                          | ↓ (P=0.0001)                   | NS                    | ↓ 8 (P=0.0004)                                                                                                                                        |
| miR 208b-3p      | (Philipone <i>et al.</i> , 2016) ↑                     | NS                          | NS                             | NS                    | Progressive Vs<br><br>Non-progressive: ↑1.73<br>(p<0.049)                                                                                             |
| miR 129-2-<br>3p | (Philipone <i>et al.</i> , 2016)<br>↓↑                 | NS                          | NS                             | NS                    | ↓ in deep sequencing analysis<br>and ↑ in validation set (Nss).<br><br>Progressive Vs non-<br>progressive: ↑1.36 (p<0.391)                            |
| miR 3065-5p      | (Philipone <i>et al.</i> , 2016) ↓                     | NS                          | NS                             | NS                    | ↓0.86 in progressive group.<br>(p<0.564)                                                                                                              |

|             |                                            |                                                             |                                            |                                              |                  |
|-------------|--------------------------------------------|-------------------------------------------------------------|--------------------------------------------|----------------------------------------------|------------------|
|             |                                            |                                                             |                                            |                                              |                  |
| miR 24      | (Prasad <i>et al.</i> , 2017) ↓            | CNRQ ratios:<br>HNE/dysplasia<br>↓3.74 (p<0.05)             | NS                                         | CNRQ ratios:<br>HNE/OSCC ↓ 10.63<br>(P<0.05) | NS               |
| miR 26b     | (Prasad <i>et al.</i> , 2017) ↓            | CNRQ ratios:<br>HNE/OED ↓ 7.23<br>(p<0.05)                  | CNRQ ratios: OSCC/OED ↓<br>2.77 (P<0.05)   | CNRQ ratios: HNE/OSCC<br>↓ 2.58 (P<0.05)     | NS               |
| miR 155     | (Prasad <i>et al.</i> , 2017) ↓            | CNRQ ratios:<br>HNE/OED ↓ 26.65<br>(P<0.05)                 | NS                                         | CNRQ ratios: HNE/OSCC<br>↓ 8.67 (P<0.05)     | NS               |
| miR 127     | (Prasad <i>et al.</i> , 2017) ↑            | CNRQ ratios:<br>OED/HNE: ↑ 14.87<br>(P<0.05)                | CNRQ ratios: OED/OSCC: ↑<br>8.95 (P<0.05)  | NS                                           | NS               |
| miR 197     | (Prasad <i>et al.</i> , 2017) ↑            | NS                                                          | NS                                         | NS                                           | NS               |
| miR 197-3p  | (Yang <i>et al.</i> 2013) ↓                | NS                                                          | NS                                         | NS                                           | ↓16.89 (p<0.042) |
| miR 210     | (Prasad <i>et al.</i> , 2017)<br>Unchanged | CNRQ Ratio –<br>Unchanged (p>0.05)                          | NS                                         | CNRQ Ratio –<br>Unchanged (p>0.05)           | NS               |
| miR 19b     | (Prasad <i>et al.</i> , 2017)<br>Unchanged | CNRQ Ratio –<br>Unchanged (p>0.05)                          | NS                                         | CNRQ Ratio –<br>Unchanged (p>0.05)           | NS               |
| miR 19a-3p  | (Yang <i>et al.</i> , 2013) ↑              | NS                                                          | NS                                         | NS                                           | ↑9.24 (p<0.007)  |
| miR 205     | (Prasad <i>et al.</i> , 2017)<br>Unchanged | CNRQ Ratio –<br>Unchanged (p>0.05)                          | NS                                         | CNRQ Ratio –<br>Unchanged (p>0.05)           | NS               |
| miR 145     | (Zahran <i>et al.</i> , 2015) ↓            | With OED: ↓<br>(P<0.001)<br><br>Without OED: ↓<br>(P<0.001) | With OED:0.6 (nss)<br><br>Without OED: Nss | ↓ (p<0.001)                                  | NS               |
| miR 145-5p  | (Yang <i>et al.</i> , 2013) ↓              | NS                                                          | NS                                         | NS                                           | ↓12.75 (p<0.01)  |
| miR 125a    | (Santhi <i>et al.</i> , 2013) ↓            | ↓ 0.39 (mean qrt<br>exp) (p<0.0001)                         | NS                                         | ↓0.23 (P<0.0001)                             | NS               |
| miR 125b-5p | (Yang <i>et al.</i> , 2013) ↓              | NS                                                          | NS                                         | NS                                           | ↓6.80 (p<0.01)   |

|             |                                   |                                          |                                   |                                           |                   |
|-------------|-----------------------------------|------------------------------------------|-----------------------------------|-------------------------------------------|-------------------|
| miR 16      | (Santhi <i>et al.</i> , 2013) ↓   | ↓0.6 (p<0.0001)                          | NS                                | ↓0.38 (P<0.0001)                          | NS                |
| miR 96      | (Santhi <i>et al.</i> , 2013) ↑   | ↑5.42 (p<0.0001)                         | NS                                | ↑78.64 (P<0.0001)                         | NS                |
| miR 129-5p  | (Chen <i>et al.</i> , 2018) ↓     | NSD                                      | OLK-OSCC vs OLK : ↓<br>(p=0.0041) | OLK-OSCC vs N : ↓<br>(p=0.0001)           | NS                |
| miR 296-5p  | (Chen <i>et al.</i> , 2018) ↓     | NSD                                      | OLK-OSCC vs OLK : ↓<br>(p=0.0014) | OLK-OSCC vs N : ↓<br>(p=0.0002)           | NS                |
| miR 450b-5p | (Chen <i>et al.</i> , 2018) ↑     | Normal vs OLK: ↓<br>(p=0.046)            | OLK-OSCC vs OLK : ↑<br>(p=0.0007) | OLK-OSCC vs N: ↑<br>(p=0.0001)            | NS                |
| miR196b     | (Lu <i>et al.</i> , 2015) ↑       | ↑14.8 (p<0.01)<br><br>OR 46.2 (P<0.0001) | NS                                | ↑17.0 (p<0.0001)<br><br>OR 189 (P<0.0001) | NS                |
| miR 146b    | (Cervigne <i>et al.</i> , 2009) ↑ | NS                                       | NS                                | NS                                        | ↑                 |
| miR 372     | (Kao <i>et al.</i> , 2015) ↑↓     | ↑                                        | NS                                | ↓                                         | NS                |
| let 7i      | (Kao <i>et al.</i> , 2015) ↑↓     | ↓                                        | NS                                | ↑                                         | NS                |
| let 7a-5p   | (Yang <i>et al.</i> , 2013) ↓     | NS                                       | NS                                | NS                                        | ↓5.74 (p<0.039)   |
| miR 10b-5p  | (Yang <i>et al.</i> , 2013) ↑     | NS                                       | NS                                | NS                                        | ↑ 11.51 (p<0.008) |
| miR 99a-5p  | (Yang <i>et al.</i> , 2013) ↓     | NS                                       | NS                                | NS                                        | ↓ 6.8 (p<0.011)   |
| miR 99b-5p  | (Yang <i>et al.</i> , 2013) ↓     | NS                                       | NS                                | NS                                        | ↓18.75(p<0.003)   |
| miR 100-5p  | (Yang <i>et al.</i> , 2013) ↓     | NS                                       | NS                                | NS                                        | ↓8.33 (p<0.01)    |
| miR 331-3p  | (Yang <i>et al.</i> , 2013) ↓     | NS                                       | NS                                | NS                                        | ↓6.84 (p<0.01)    |
| miR 15a-5p  | (Yang <i>et al.</i> , 2013) ↓     | NS                                       | NS                                | NS                                        | ↓12.51 (p<0.002)  |
| miR 708     | (Yang <i>et al.</i> , 2013) ↑     | NS                                       | NS                                | NS                                        | ↑11.89 (p<0.014)  |
| miR 150-5p  | (Yang <i>et al.</i> , 2013) ↓     | NS                                       | NS                                | NS                                        | ↓5.63 (p<0.002)   |
| miR 30e-3p  | (Yang <i>et al.</i> , 2013) ↑     | NS                                       | NS                                | NS                                        | ↑20.41 (p<0.002)  |
| miR 30a-3p  | (Yang <i>et al.</i> , 2013) ↑     | NS                                       | NS                                | NS                                        | ↑3.80 (p<0.049)   |
| miR 335-5p  | (Yang <i>et al.</i> , 2013) ↑     | NS                                       | NS                                | NS                                        | ↑2.08 (p<0.039)   |
| miR 144*    | (Yang <i>et al.</i> , 2013) ↑     | NS                                       | NS                                | NS                                        | ↑12.22 (p<0.005)  |
| miR 25-3p   | (Yang <i>et al.</i> , 2013) ↑     | NS                                       | NS                                | NS                                        | ↑12.88 (p<0.017)  |
| miR 660-5p  | (Yang <i>et al.</i> , 2013) ↑     | NS                                       | NS                                | NS                                        | ↑27.92 (p<0.02)   |
| miR 140-5p  | (Yang <i>et al.</i> , 2013) ↑     | NS                                       | NS                                | NS                                        | ↑16.23 (p<0.012)  |
| miR 590-5p  | (Yang <i>et al.</i> , 2013) ↑     | NS                                       | NS                                | NS                                        | ↑15.79 (p<0.004)  |

|           |                                   |                     |    |                     |                  |
|-----------|-----------------------------------|---------------------|----|---------------------|------------------|
| miR-17-5p | (Cervigne <i>et al.</i> , 2009) ↓ | ↓0.351 Nss (p=0.98) | NS | ↓0.644 Nss (p=0.97) | NS               |
| miR-106b  | (Cervigne <i>et al.</i> , 2009) ↑ | ↑ 1.157 (p=0.067)   | NS | ↑1.134 (P=0.054)    | NS               |
| miR-518b  | (Cervigne <i>et al.</i> , 2009) ↑ | ↑2.557 (P<0.01)     | NS | ↑3.076 (p<0.01)     | ↑ in progressive |
| miR-520g  | (Cervigne <i>et al.</i> , 2009) ↑ | ↑2.57 (P<0.01)      | NS | ↑9.932 (P<0.01)     | ↑ in progressive |
| miR-649   | (Cervigne <i>et al.</i> , 2009) ↑ | ↑3.77 (P<0.01)      | NS | ↑3.464 (P<0.01)     | ↑ in progressive |

OSCC: Oral Squamous Cell Carcinoma; N: normal mucosa; OLK: Oral Leukoplakia; OED: Oral Epithelial Dysplasia; NS- not specified; NSS- not statistically significant;

OPMD: Oral Potentially Malignant Disorders; NSD: No significant difference.
